# Supplementary material for: Automated PD-L1 Scoring Using Artificial Intelligence in Head and Neck Squamous Cell Carcinoma
Source: MDPI journal article supplement (doi:10.3390/cancers13174409), 2021-08-31
Supplement: s1 [file s1]

# Supplementary Material: Automated PD-L1 Scoring Using Artificial Intelligence in Head and Neck Squamous Cell Carcinoma

Behrus Puladi, Mark Ooms, Svetlana Kintsler, Khosrow Siamak Houshyar, Florian Steib, Ali Modabber, Frank Hölzle, Ruth Knüchel-Clarke and Till Braunschweig

**Table S1.** Mean cell measurements of tumor, immune and stromal cells. Measured features are based on cell segmentation with StarDist in QuPath. OD: Optical density;.

| Feature                               | Tumor cells | Immune cells | Stromal cells |
|---------------------------------------|-------------|--------------|---------------|
| Cell: Area $\mu\text{m}^2$            | 165.09      | 89.74        | 136.52        |
| Cell: Circularity                     | 0.84        | 0.80         | 0.86          |
| Cell: Length $\mu\text{m}$            | 48.49       | 36.93        | 43.94         |
| Cell: Max diameter $\mu\text{m}$      | 17.66       | 13.63        | 15.77         |
| Cell: Min diameter $\mu\text{m}$      | 12.44       | 9.34         | 11.49         |
| Cell: Solidity                        | 0.97        | 0.97         | 0.98          |
| Nucleus: Area $\mu\text{m}^2$         | 47.89       | 25.90        | 24.23         |
| Nucleus: Circularity                  | 0.91        | 0.92         | 0.88          |
| Nucleus: Length $\mu\text{m}$         | 25.09       | 18.54        | 18.41         |
| Nucleus: Max diameter $\mu\text{m}$   | 9.28        | 6.61         | 6.91          |
| Nucleus: Min diameter $\mu\text{m}$   | 6.40        | 5.05         | 4.56          |
| Nucleus: Solidity                     | 0.99        | 0.99         | 0.99          |
| Nucleus/Cell area ratio               | 0.30        | 0.31         | 0.19          |
| Detection probability                 | 0.72        | 0.68         | 0.67          |
| Hematoxylin: Cell: Max (OD)           | 0.75        | 0.94         | 0.81          |
| Hematoxylin: Cell: Mean (OD)          | 0.26        | 0.33         | 0.19          |
| Hematoxylin: Cell: Median (OD)        | 0.22        | 0.28         | 0.13          |
| Hematoxylin: Cell: Min (OD)           | 0.02        | 0.02         | −0.01         |
| Hematoxylin: Cell: Std.Dev. (OD)      | 0.16        | 0.21         | 0.17          |
| Hematoxylin: Cytoplasm: Max (OD)      | 0.58        | 0.74         | 0.57          |
| Hematoxylin: Cytoplasm: Mean (OD)     | 0.18        | 0.23         | 0.13          |
| Hematoxylin: Cytoplasm: Median (OD)   | 0.16        | 0.19         | 0.10          |
| Hematoxylin: Cytoplasm: Min (OD)      | 0.02        | 0.02         | −0.01         |
| Hematoxylin: Cytoplasm: Std.Dev. (OD) | 0.10        | 0.14         | 0.09          |
| Hematoxylin: Membrane: Max (OD)       | 0.48        | 0.67         | 0.42          |
| Hematoxylin: Membrane: Mean (OD)      | 0.18        | 0.24         | 0.12          |
| Hematoxylin: Membrane: Median (OD)    | 0.16        | 0.19         | 0.10          |
| Hematoxylin: Membrane: Min (OD)       | 0.03        | 0.03         | 0.00          |
| Hematoxylin: Membrane: Std.Dev. (OD)  | 0.10        | 0.16         | 0.09          |
| Hematoxylin: Nucleus: Max (OD)        | 0.74        | 0.92         | 0.80          |
| Hematoxylin: Nucleus: Mean (OD)       | 0.43        | 0.56         | 0.46          |
| Hematoxylin: Nucleus: Median (OD)     | 0.43        | 0.56         | 0.46          |
| Hematoxylin: Nucleus: Min (OD)        | 0.16        | 0.20         | 0.13          |
| Hematoxylin: Nucleus: Std.Dev. (OD)   | 0.12        | 0.16         | 0.16          |

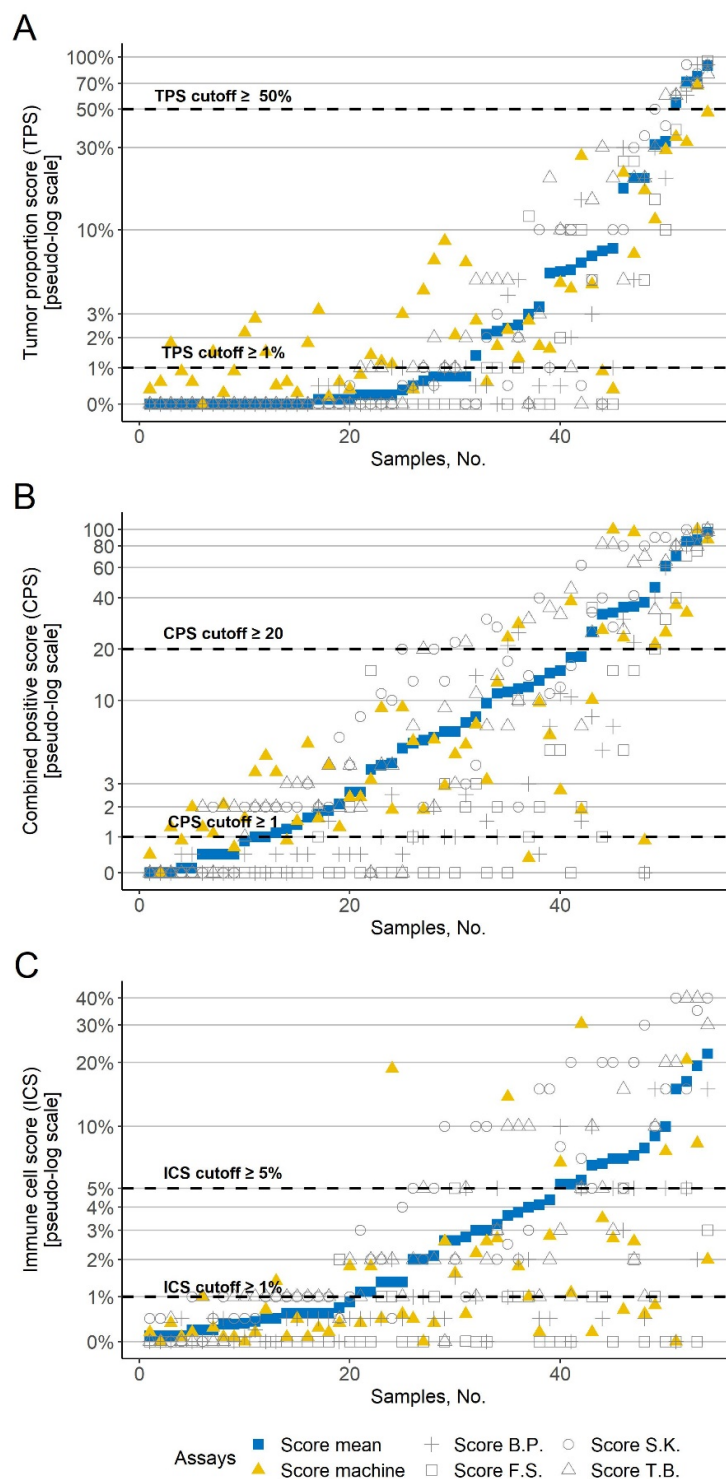

**Figure S1.** Results of PD-L1 scoring. (A–C) Three PD-L1 scores for all cases. ■ PD-L1 average score of the four human investigators. ▲ Automated PD-L1 score based. The gray symbols correspond to the four investigators (+ B.P., □ F.S., ○ S.K., and △ T.B.); The x-axis shows the samples. The y-axis shows the corresponding PD-L1 scores in pseudo-log scale. The dashed line indicates common cutoffs. The values are sorted in ascending order according to the PD-L1 average score of the four investigators. (A) Tumor proportion score (TPS). (B) Combined positive score (CPS). (C) Immune cell score (ICS).

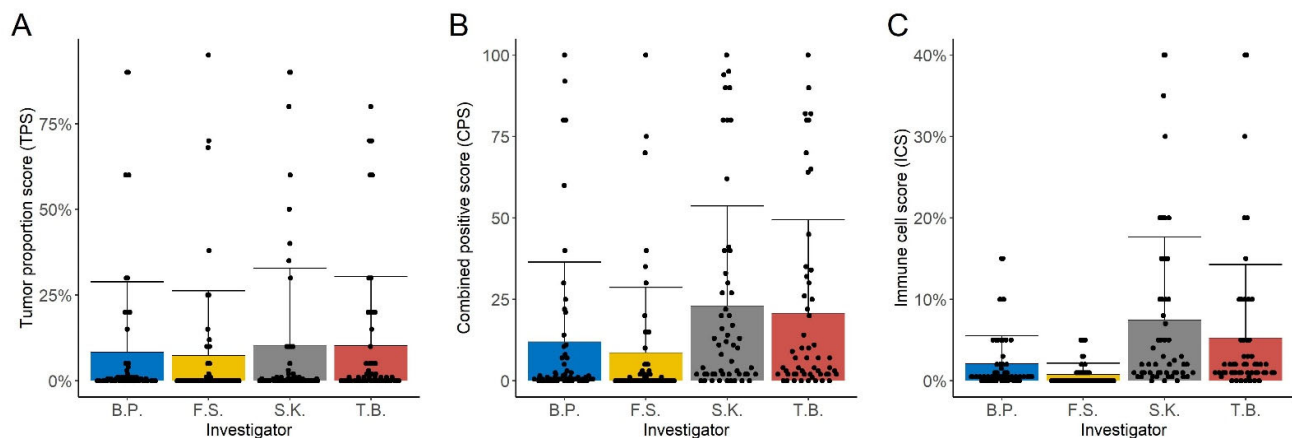

**Figure S2.** Results of PD-L1 scoring. (A-C). PD-L1 scores of the four human investigators; The height of the bars corresponds to the mean and the error bar corresponds to the standard deviation of the PD-L1 scores of the corresponding investigator. The black dots correspond to individual measurements. The x-axis shows the investigators. The y-axis shows the corresponding PD-L1 scores. F.S., S.K. and T.B. are specialists in pathology. B.P. also performed scoring after intensive training. The scores of B.P. are in the range of other three investigators. (A) Tumor proportion score (TPS). (B) Combined positive score (CPS). (C) Immune cell score (ICS).
